# Supplementary material for: Pectasol‐C Modified Citrus Pectin targets Galectin‐3‐induced STAT3 activation and synergize paclitaxel cytotoxic effect on ovarian cancer spheroids
Source: PubMed Central journal article supplement (PMC6675724; doi:10.1002/cam4.2334), 2019-06-13

## Figure legends

**Figure S1. Isolated normal primary ovarian surface epithelial cells (OSE) has epithelial morphology and express epithelial markers.** OSE cells were isolated as described in material and methods. **A.** Photos showed cobble-stone epithelial morphology of OSE cells (a and b) compared to spindle-like morphology of fibroblasts in c. **B.** RT-PCR showed that OSE cells express epithelial markers (CDH1, EpCAM, KRT18 and KRT7) and to a lesser extent mesenchymal marker vimentin (VIM). Beta-2-macroglobulin (B2M) was used as positive control. Scale bar=100  $\mu\text{m}$  in a and c. Scale bar=200  $\mu\text{m}$  in b.

**Figure S2. Exogenous Gal-3 increase SKOV-3 cell proliferation and cell survival.** **A.** SKOV-3 MCTS were treated with rhGal-3 (30  $\mu\text{M}$ ) for 48h followed by BCL-2 and CCDN1 expression levels assessment by qRT-PCR. Results were normalized related to ACTB as internal control. **B.** Cell death analysis was performed in the presence or absence of rhGal-3 for 48h. Mean  $\pm$  SD, n=3

**Figure S3. Differential expression levels of alpha integrin subunits in BLSOC, LGSOC and HGSOC human specimens.** The extracted RNA from fresh serous type EOC tumors (n = 46) were divided into three groups borderline serous ovarian cancer (BLSOC, n=12); low-grade serous ovarian cancer (LGSOC, n=12) and high-grade serous ovarian cancer (HGSOC, n=22) as well as fresh normal ovarian tissue (n =10) were analyzed by qRT-PCR for the following mRNA expression levels: (A) ITGA2, (B) ITGA4, (C) ITGA6, (D) ITGA5, (E) ITGA $\nu$ . Dot plot comparing the distribution of normalized qRT-PCR analysis for afore-mentioned gene expression level in tumor specimens related to normal healthy ovaries. Values were normalized relative to ACTB expression levels used as internal control. \*:  $P \leq .05$ ; \*\*\*:  $P \leq .001$  compared to control.

**Figure S4. Differential expression levels of beta integrin subunits in BLSOC, LGSOC and HGSOC human specimens.** The extracted RNA from fresh serous type EOC tumors (n = 46) were divided into three groups borderline serous ovarian cancer (BLSOC, n=12); low-grade serous ovarian cancer (LGSOC, n=12) and high-grade serous ovarian cancer (HGSOC, n=22) as well as fresh normal ovarian tissue (n =10) were analyzed by qRT-PCR for the following mRNA expression levels: (A) ITGB1, (B) ITGB2, (C) ITGB3, (D) ITGB4, (E) ITGB6. Dot plot comparing the distribution of normalized qRT-PCR analysis for afore-mentioned gene expression level in tumor specimens related to normal healthy ovaries. Values were normalized relative to ACTB expression levels used as internal control. \*:  $P \leq .05$ ; \*\*:  $P \leq .01$ ; \*\*\*:  $P \leq .001$  compared to control.

**Table S1.** Clinicopathological characteristics of patients

| Tumor grade          | n  | Median age | Treatment |
|----------------------|----|------------|-----------|
| Normal ovary         | 10 | 53         | -         |
| BLSOC                | 12 | 42         | None      |
| LGSOC<br>(Grade I)   | 7  | 55         | None      |
| LGSOC<br>(Grade II)  | 5  | 47         | None      |
| HGSOC<br>(Grade III) | 12 | 56         | None      |
| HGSOC<br>(Grade IV)  | 10 | 61         | None      |

*Borderline serous ovarian cancer (BLSOC), Low-grade serous ovarian cancer (LGSOC), High-grade serous ovarian cancer (HGSOC).*

**Table S2.** Primer sequences used for qRT-PCR in this study

| <b>Genes</b> | <b>Primer sequences</b>                                                 |
|--------------|-------------------------------------------------------------------------|
| ACTB         | F: 5' - CTCCTTCCTGGGCATG-3'<br>R: 5' - GTCTTTGCGGATGTCCAC-3'            |
| B2M          | F: 5' - CCTGAATTGCTATGTGTCTGGG -3 '<br>R: 5' -TGATGCTGCTTACATGTCTCGA-3' |
| LGALS3       | F: 5' CCTCGCATGCTGATAACAATTCT-3'<br>R: 5' TGACTCTCCTGTTGTTCTCATTGAA-3'  |
| ITGB1        | F: 5' - GTGGGTGGTGCACAAATTC-3'<br>R: 5' -GGTCAATGGGATAGTCTTCAGC-3'      |
| ITGB2        | F: 5' -TTCGGGTCCTTCGTGGACA-3'<br>R: 5' - ACTGGTTGGAGTTGTTGGTCA-3'       |
| ITGB3        | F: 5' - AGCCAACAACCCACTGTA-3'<br>R: 5' - CTGACATTCTCCCAACCTAC-3'        |
| ITGB4        | F: 5' -TGGAAGTACTGTGCCTGCTG-3'<br>R: 5' -TGCATGTTGTTGGTGACCTT-3'        |
| ITGB6        | F: 5' - TCCATCTGGAGTTGGCGAAAG-3'<br>R: 5' - TCTGTCTGCCTACACTGAGAG-3'    |
| ITGA2        | F: 5' - TAGCGCTCAGTCAAGGCATT-3'<br>R: 5' - GCACTGCATAGCCAAACTGT-3'      |
| ITGA4        | F: 5' - AGCCCTAATGGAGAACCTTGT-3'<br>R: 5' - CCAGTGGGAGCTTATTTTCAT-3'    |
| ITGA5        | F: 5' - TTTATCGGTCTCGGGAGTTG-3'<br>R: 5' -CTTCAACTTAGACGCGGAGG -3'      |
| ITGA6        | F: 5' - TTTATCGGTCTCGGGAGTTG-3'<br>R: 5' - GGCCACTGAATGTTCAAGGT-3'      |
| ITGAV        | F: 5' - GCAACAGGCAATAGAGAT-3'<br>R: 5' - TGCTGAATCCTCCTTGACAA-3'        |
| EPCAM        | F: 5' - CCATGTGCTGGTGTGTGAAC -3'<br>R: 5' -CCTTCTGAAGTGCAGTCCGC -3'     |
| CDH1         | F: 5' - CAGGAGTCATCAGTGTGGT -3'<br>R: 5' - GGAGGATTATCGTTGGTGTGTCAG -3' |
| KRT7         | F: 5' - TCCGCGAGGTCACCATTAAC-3'<br>R: 5' - GCTCTGTCAACTCCGTCTCAT-3'     |
| KRT18        | F: 5' - GGAGGCATCCAGAACGAGAA- 3'<br>R: 5' - CCAGCTGCAGTCGTGTGATA- 3'    |
| VIM          | F: 5' - GGCTCGTCACCTTCGTGAAT - 3'<br>R: 5' - GAGAAATCCTGCTCTCCTCGC - 3' |

**Figure S1**

**A**

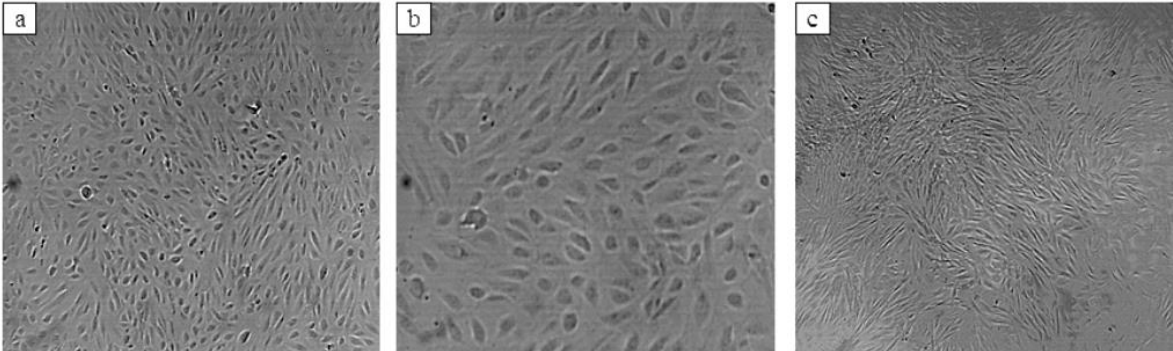

**B**

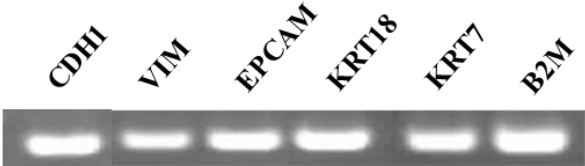

**Figure S2**

**A**

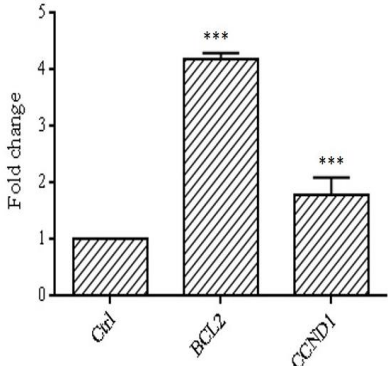

**B**

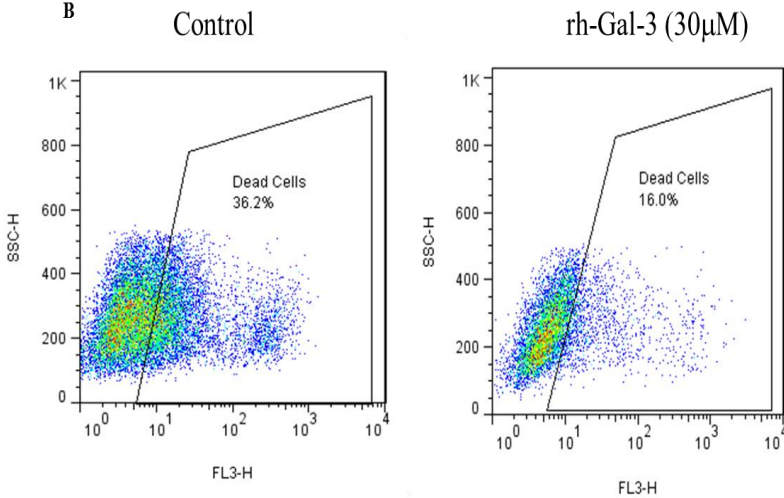

**Figure S3**

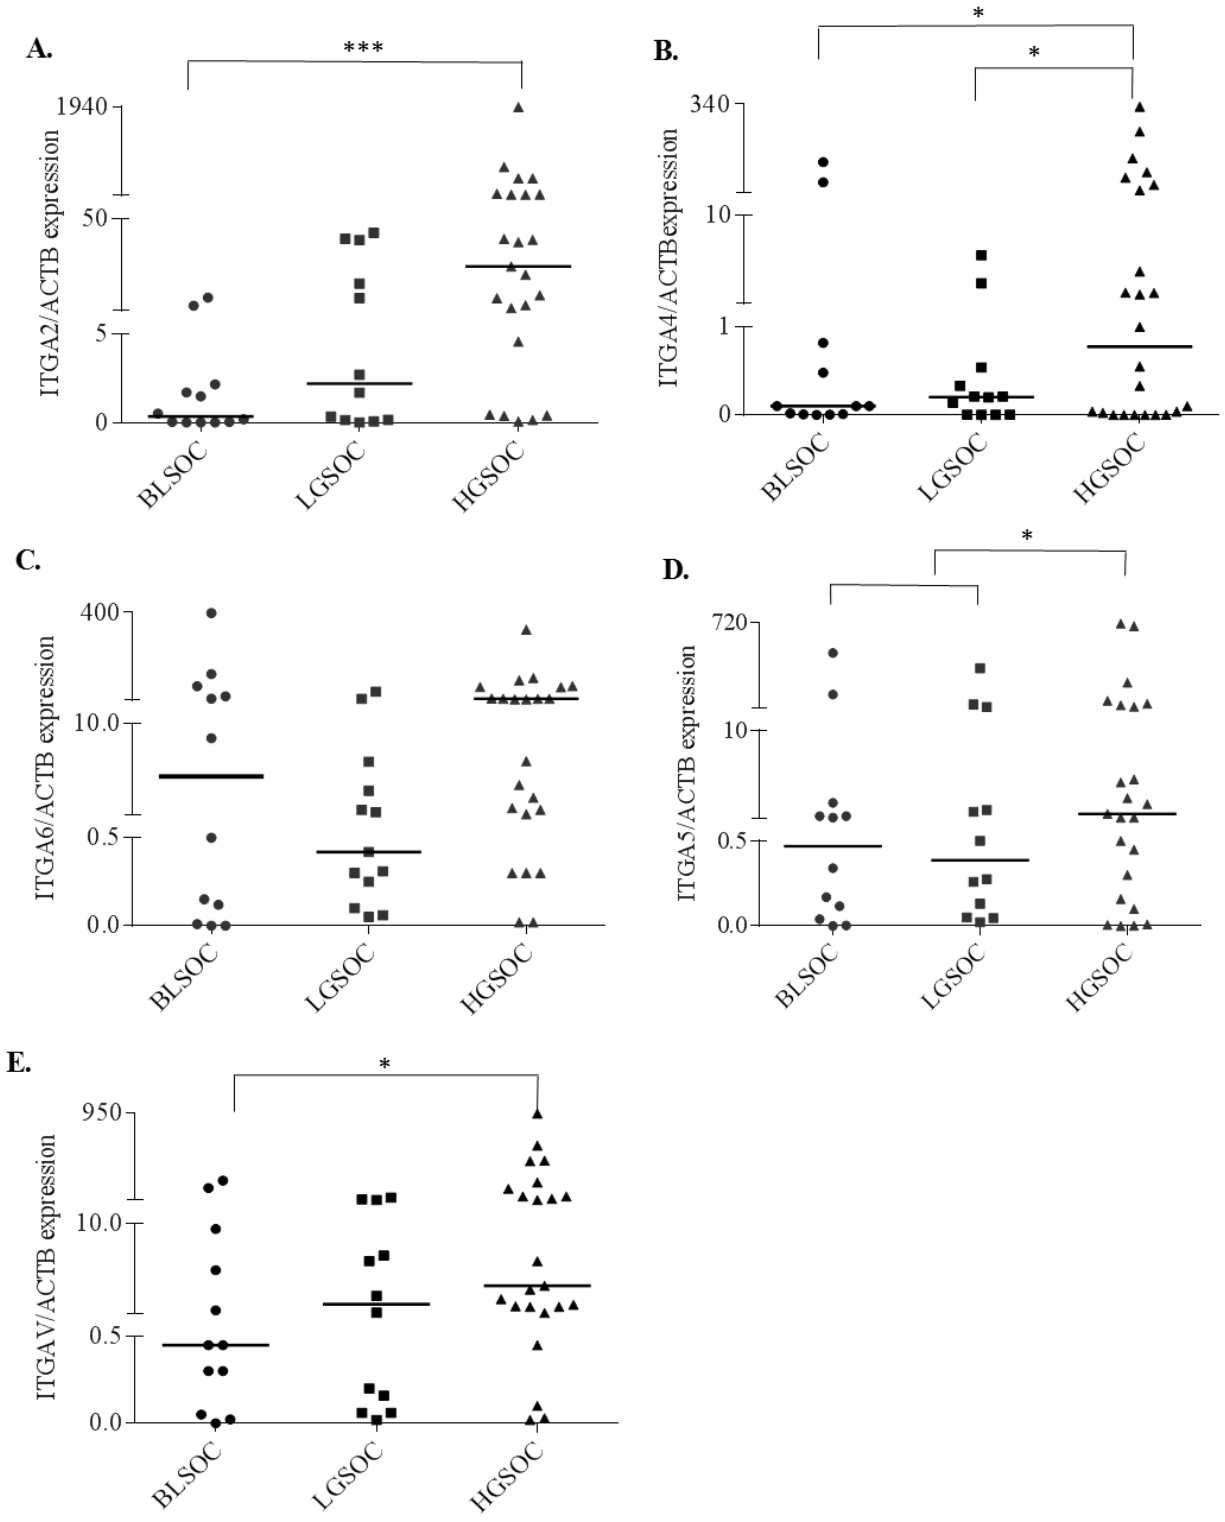

**Figure S4**

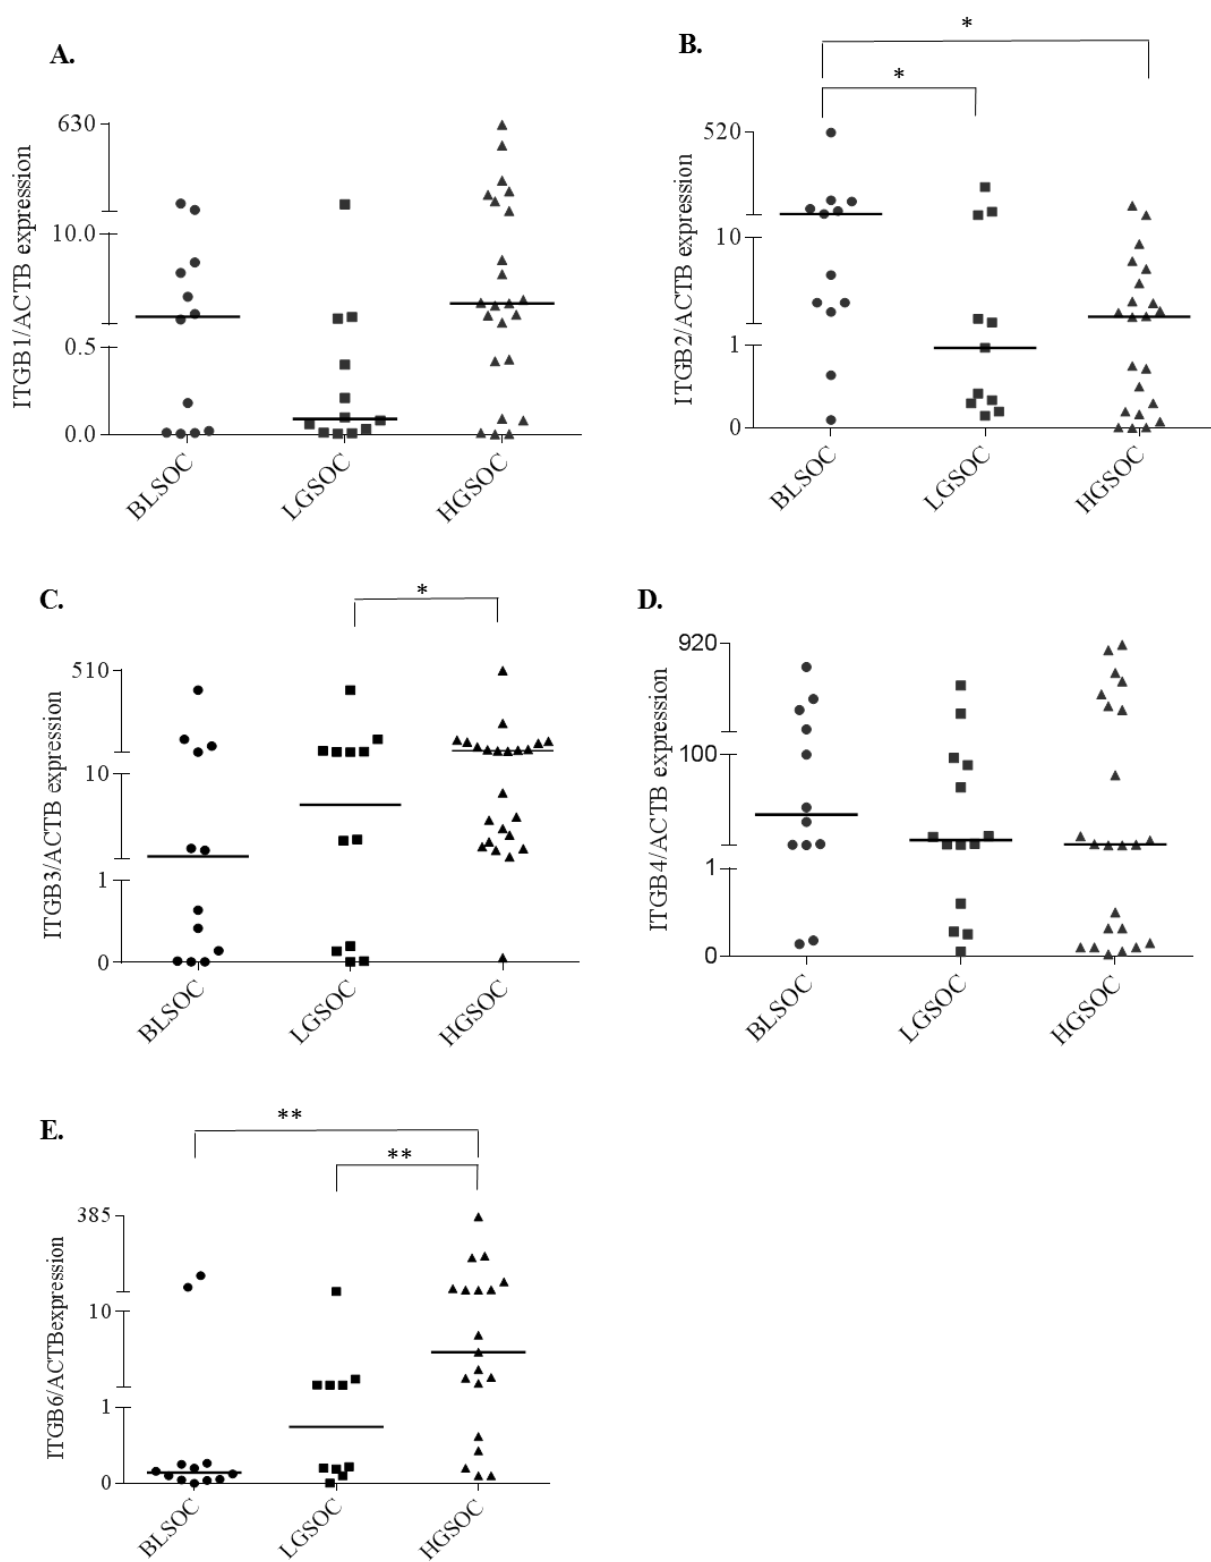

Supplement: CAM4-8-4315-s001.pdf [file CAM4-8-4315-s001.pdf]
